# Supplementary material
Source: MDPI journal article supplement (https://www.mdpi.com/2073-4395/12/7/1711)
Supplement: s1 [file s1]

Archive with 3 entries (3 files):
- Figure S1. Values of delta-K.pdf
- Tabla S2. SSRs used for molecular characterization.pdf
- Table S1. Information of the pear samples.xlsx
