# Supplementary material
Source: MDPI journal article supplement (https://www.mdpi.com/2073-4395/12/7/1711)
Supplement: s1 [file s1 › Figure S1. Values of delta-K.pdf]

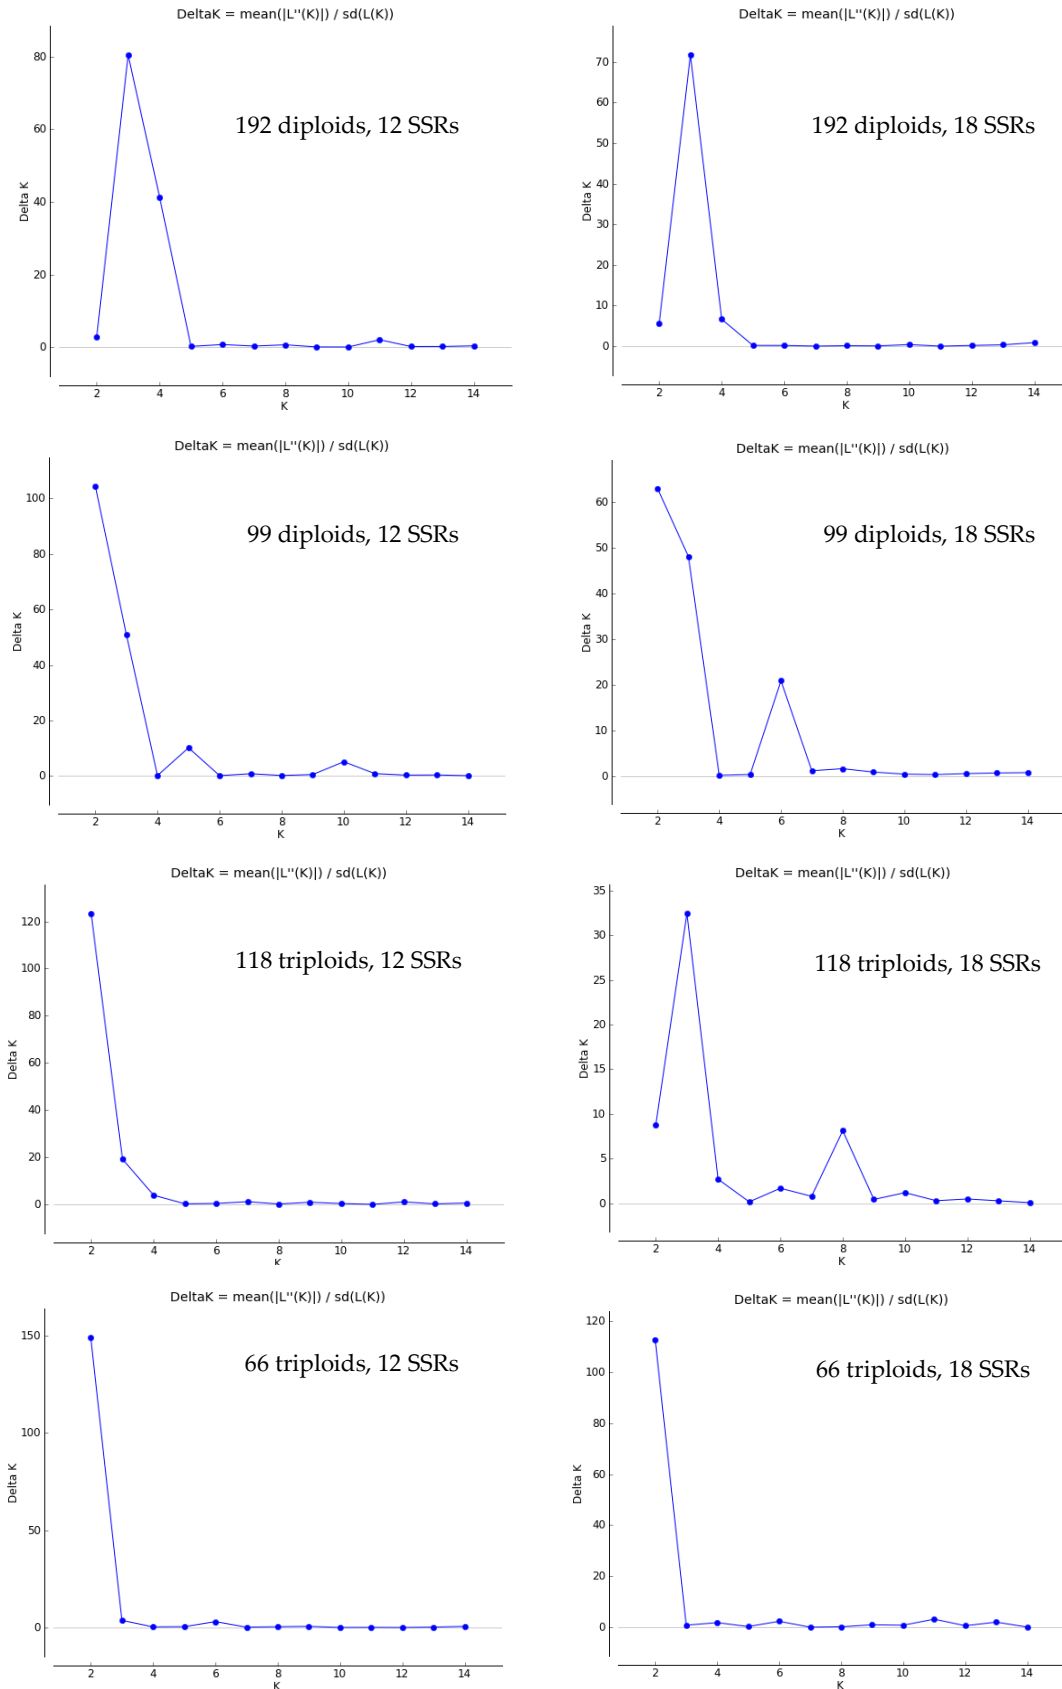

Figure S1. Values of  $\Delta K$  defined by the method of Evanno et al. [39] obtained by STRUCTURE HARVESTER software [40] for the formation of Reconstructed Panmictic Populations for the total pear genotypes (192 diploid and 118 triploid) and for those located in the Canary Islands and commercial varieties (99 diploid and 66 triploid). In both groups, population structure analysis was performed in STRUCTURE ver 2.2.4 software (Pritchard Lab, Stanford University, Stanford, CA, USA) [35] for 18 SSRs and for a reduced set after the elimination of those with higher percentage of null alleles and linked loci (12 SSRs), in order to verify the results.
