# Supplementary material
Source: MDPI journal article supplement (https://www.mdpi.com/2073-4395/12/7/1711)
Supplement: s1 [file s1 › Tabla S2. SSRs used for molecular characterization.pdf]

Table S2. SSRs used for molecular characterization: locus, linkage group and PCR details.

| Locus    | Linkage Group | Multiplex | Dye   | Forward (marcado)                | References |
|----------|---------------|-----------|-------|----------------------------------|------------|
|          |               |           |       | Reverse                          |            |
| CH01d03  | 4             | 4         | VIC   | CCA CTT GGC AAT GAC TCC TC       | [27]       |
|          |               |           |       | ACC TTA CCG CCA ATG TGA AG       |            |
| CH01d08* | 15            | 1         | NED   | CTC CGC CGC TAT AA CAC TTC       | [27]       |
|          |               |           |       | CTC CGC CGC TAT AAC ACT TC       |            |
| CH01d09* | 12            | 2         | VIC   | GCC ATC TGA ACA GAA TGT GC       | [27]       |
|          |               |           |       | CCC TTC ATT CAC ATT TCC AG       |            |
| CH01f07* | 10            | 1         | VIC   | CCC TAC ACA GTT TCT CAA CCC      | [27]       |
|          |               |           |       | CGT TTT TGG AGC GTA GGA AC       |            |
| CH02b10* | 2             | 2         | PET   | CAA GGA AAT CAT CAA AGA TTC AAG  | [29]       |
|          |               |           |       | CAA GTG GCT TCG GAT AGT TG       |            |
| CH02c09  | 15            | 3         | 6-FAM | TTA TGT ACC AAC TTT GCT AAC CTC  | [27]       |
|          |               |           |       | AGA AGC AGC AGA GGA GGA TG       |            |
| CH02c11  | 10            | 4         | PET   | TGA AGG CAA TCA CTC TGT GC       | [27]       |
|          |               |           |       | TTC CGA GAA TCC TCT TCG AC       |            |
| CH02d11  | 15            | 4         | NED   | AGC GTC CAG AGC AAC AGC          | [29]       |
|          |               |           |       | AAC AAA AGC AGAT CCG TTG C       |            |
| CH03d12* | 6             | 2         | 6-FAM | GCC CAG AAG CAA TAA GTA AAC C    | [27]       |
|          |               |           |       | ATT GCT CCA TGC ATA AAG GG       |            |
| CH03g07* | 3             | 1         | 6-FAM | AAT AAG CAT TCA AAG CAA TCCG     | [27]       |
|          |               |           |       | TTT TTC CAA ATC GAG TTT CGT T    |            |
| CH04e03* | 5             | 1         | PET   | TTG AAG ATG TTT GGC TGT GC       | [27]       |
|          |               |           |       | TGC ATG TCT GTC TCC TCC AT       |            |
| CH05a02* | 8, 15         | 1         | 6-FAM | GTT GCA AGA GTT GCA TGT TAG C    | [27]       |
|          |               |           |       | TTT TGA CCC CAT AAA ACC CAC      |            |
| CH05c06* | 16            | 3         | 6-FAM | ATT GGA ACT CTC CGT ATT GTG C    | [27]       |
|          |               |           |       | ATC AAC AGT AGT GGT AGC CGG T    |            |
| CH-Vf1*  | 1             | 2         | NED   | ATC ACC ACC AGC AGC AAA G        | [28]       |
|          |               |           |       | CAT ACA AAT CAA AGC ACA ACC C    |            |
| EMPC11*  | 11            | 3         | NED   | GCG ATT AAA GAT CAA TAA ACC CATA | [30]       |
|          |               |           |       | AAG CAG CTG GTT GGT GAA AT       |            |
| EMPC117* | 7             | 3         | VIC   | GTT CTA TCT ACC AAG CCA CGC T    | [30]       |
|          |               |           |       | CGT TTG TGT GTT TTA CGT GTT G    |            |
| GD142*   | 9             | 4         | 6-FAM | TTG AGG TGT TTC TCC CAT TGG A    | [31]       |
|          |               |           |       | CTA ACG AAG CCG CCA TTT CTT T    |            |
| GD147*   | 13            | 3         | PET   | TCC CGC CAT TTC TCT GC           | [31]       |
|          |               |           |       | GTT TAA ACC GCT GCT GCT GAA C    |            |

\*SSRs recommended by the European Cooperative Programme for Plant Genetic Resources (ECPGR) [32]
