# Supplementary material
Source: MDPI journal article supplement (https://www.mdpi.com/2073-4395/12/7/1711)
Supplement: s1 [file s1 › Table S1. Information of the pear samples.xlsx]

## Sheet: Table S1. Information
Table S1. Information of the pear samples used in this study: code or accession name, origin, putative ploidy, genetic group and group assignment by structure analysis when K=3 and 18 SSRs were considered. Accessions with qI≤0.8 were considerated Admixed.
	Code/Name	Origin	Putative Ploidy	Genetic Group	K3 18SSRs
1	CBT02059	Tenerife (Canary Islands)	2	5	RPP3
2	CBT01564	Tenerife (Canary Islands)	3	6	RPP3
3	CBT00452	Tenerife (Canary Islands)	3	16	RPP3
4	CBT00460	Tenerife (Canary Islands)	3	16	RPP3
5	CBT00469	Tenerife (Canary Islands)	3	16	RPP3
6	CBT00481	Tenerife (Canary Islands)	3	16	RPP3
7	CBT00934_A	Tenerife (Canary Islands)	3	16	RPP3
8	CBT01558	Tenerife (Canary Islands)	3	16	RPP3
9	CBT01620	Tenerife (Canary Islands)	3	16	RPP3
10	CBT01853	Tenerife (Canary Islands)	3	16	RPP3
11	CBT01920	Tenerife (Canary Islands)	3	16	RPP3
12	CBT01922	Tenerife (Canary Islands)	3	16	RPP3
13	CBT02103	Tenerife (Canary Islands)	3	16	RPP3
14	CBT02159	Tenerife (Canary Islands)	3	16	RPP3
15	CBT02162	Tenerife (Canary Islands)	3	16	RPP3
16	DHH0002	Tenerife (Canary Islands)	3	16	RPP3
17	CBT02755	Tenerife (Canary Islands)	2	25	RPP2
18	CBT01282	Tenerife (Canary Islands)	2	34	RPP3
19	CBT01569	Tenerife (Canary Islands)	2	34	RPP3
20	CBT01927	Tenerife (Canary Islands)	2	34	RPP3
21	CBT02448	Tenerife (Canary Islands)	2	34	RPP3
22	CBT00599	Tenerife (Canary Islands)	2	35	RPP3
23	CBT00604_P	Tenerife (Canary Islands)	2	35	RPP3
24	CBT01264	Tenerife (Canary Islands)	2	35	RPP3
25	CBT01746	Tenerife (Canary Islands)	2	42	Admixed
26	CBT03066	Tenerife (Canary Islands)	2	42	Admixed
27	CBT02071	Tenerife (Canary Islands)	2	44	RPP1
28	CBT00080	Tenerife (Canary Islands)	2	45	RPP1
29	CBT01744	Tenerife (Canary Islands)	2	45	RPP1
30	CBT01852	Tenerife (Canary Islands)	2	45	RPP1
31	CBT03065	Tenerife (Canary Islands)	2	45	RPP1
32	MEVB0057	Tenerife (Canary Islands)	2	45	RPP1
33	A179	Tenerife (Canary Islands)	3	48	RPP1
34	CBT01281	Tenerife (Canary Islands)	3	50	RPP1
35	CBT01416	Tenerife (Canary Islands)	3	50	RPP1
36	CBT01616	Tenerife (Canary Islands)	3	50	RPP1
37	CBT01743	Tenerife (Canary Islands)	3	50	RPP1
38	CBT02088	Tenerife (Canary Islands)	3	50	RPP1
39	CBT03068	Tenerife (Canary Islands)	3	50	RPP1
40	DHH0007	Tenerife (Canary Islands)	3	50	RPP1
41	CBT01929	Tenerife (Canary Islands)	2	54	RPP3
42	CBT02472	Tenerife (Canary Islands)	2	54	RPP3
43	DHH0041	Tenerife (Canary Islands)	2	54	RPP3
44	MEVB0051	Tenerife (Canary Islands)	2	54	RPP3
45	MEVB0056	Tenerife (Canary Islands)	2	54	RPP3
46	CBT01850	Tenerife (Canary Islands)	3	62	RPP1
47	CBT02053	Tenerife (Canary Islands)	3	62	RPP1
48	CBT02058	Tenerife (Canary Islands)	3	62	RPP1
49	CBT00805	Tenerife (Canary Islands)	2	63	RPP3
50	CBT02050	Tenerife (Canary Islands)	2	63	RPP3
51	CBT02087	Tenerife (Canary Islands)	2	63	RPP3
52	CBT00604	Tenerife (Canary Islands)	3	64	RPP1
53	CBT00947	Tenerife (Canary Islands)	3	64	RPP1
54	CBT01184	Tenerife (Canary Islands)	3	64	RPP1
55	CBT01615	Tenerife (Canary Islands)	3	64	RPP1
56	CBT01846	Tenerife (Canary Islands)	3	64	RPP1
57	CBT02052	Tenerife (Canary Islands)	3	64	RPP1
58	DHH0019	Tenerife (Canary Islands)	3	64	RPP1
59	CBT00488	Tenerife (Canary Islands)	3	67	Admixed
60	CBT00600	Tenerife (Canary Islands)	3	67	Admixed
61	CBT00300	Tenerife (Canary Islands)	3	69	RPP3
62	CBT02109	Tenerife (Canary Islands)	3	71	RPP1
63	CBT02061	Tenerife (Canary Islands)	3	75	RPP1
64	CBT02074	Tenerife (Canary Islands)	3	75	RPP1
65	CBT00961	Tenerife (Canary Islands)	2	76	Admixed
66	CBT02069	Tenerife (Canary Islands)	2	76	Admixed
67	A198	Tenerife (Canary Islands)	2	77	RPP1
68	CBT02062	Tenerife (Canary Islands)	2	77	RPP1
69	CBT02160	Tenerife (Canary Islands)	2	85	RPP3
70	CBT02055	Tenerife (Canary Islands)	2	109	RPP1
71	CBT00625	Tenerife (Canary Islands)	2	111	RPP3
72	CBT02063	Tenerife (Canary Islands)	2	112	RPP1
73	CBT00365	Tenerife (Canary Islands)	2	122	RPP3
74	CBT01500	Tenerife (Canary Islands)	3	125	RPP1
75	CBT02064	Tenerife (Canary Islands)	3	125	RPP1
76	CBT02157	Tenerife (Canary Islands)	3	125	RPP1
77	NOP0190	Tenerife (Canary Islands)	3	125	RPP1
78	CBT02056	Tenerife (Canary Islands)	2	140	Admixed
79	CBT00423	Tenerife (Canary Islands)	2	150	RPP3
80	CBT00448	Tenerife (Canary Islands)	2	155	RPP1
81	CBT00575	Tenerife (Canary Islands)	2	155	RPP1
82	CBT00444	Tenerife (Canary Islands)	2	162	RPP3
83	CBT01338	Tenerife (Canary Islands)	2	164	RPP1
84	CBT00512	Tenerife (Canary Islands)	2	165	RPP1
85	CBT00566	Tenerife (Canary Islands)	2	165	RPP1
86	CBT01745	Tenerife (Canary Islands)	2	165	RPP1
87	CBT02078	Tenerife (Canary Islands)	2	166	RPP1
88	CBT01061	Tenerife (Canary Islands)	3	167	RPP2
89	CBT00601	Tenerife (Canary Islands)	2	173	RPP1
90	MEVB0048	Tenerife (Canary Islands)	2	173	RPP1
91	CBT02391	Tenerife (Canary Islands)	2	175	Admixed
92	CBT01854	Tenerife (Canary Islands)	2	176	RPP2
93	C2052	Tenerife (Canary Islands)	3	179	RPP1
94	CBT00355	Tenerife (Canary Islands)	3	180	RPP3
95	CBT00934_B	Tenerife (Canary Islands)	3	180	RPP3
96	CBT01415	Tenerife (Canary Islands)	3	180	RPP3
97	CBT02075	Tenerife (Canary Islands)	3	180	RPP3
98	CBT02444	Tenerife (Canary Islands)	3	180	RPP3
99	CBT02051	Tenerife (Canary Islands)	3	187	RPP3
100	CBT02065	Tenerife (Canary Islands)	3	188	RPP3
101	CBT02072	Tenerife (Canary Islands)	3	212	RPP2
102	CBT00470	Tenerife (Canary Islands)	2	213	Admixed
103	CBT00809	Tenerife (Canary Islands)	2	219	RPP1
104	CBT01049	Tenerife (Canary Islands)	2	223	RPP1
105	CBT01851	Tenerife (Canary Islands)	2	225	RPP1
106	MEVB0050	Tenerife (Canary Islands)	2	225	RPP1
107	CBT02753	Tenerife (Canary Islands)	2	229	RPP1
108	CBT02764	Tenerife (Canary Islands)	2	229	RPP1
109	V-6	Tenerife (Canary Islands)	2	229	RPP1
110	CBT00426	Tenerife (Canary Islands)	2	230	RPP3
111	CBT01280	Tenerife (Canary Islands)	3	239	RPP1
112	CBT00956	Tenerife (Canary Islands)	3	240	RPP1
113	CBT01981	Tenerife (Canary Islands)	2	245	Admixed
114	CBT02054	Tenerife (Canary Islands)	2	245	Admixed
115	V-14	Tenerife (Canary Islands)	2	245	Admixed
116	CBT00949	Tenerife (Canary Islands)	3	248	RPP1
117	CBT02077	Tenerife (Canary Islands)	3	256	RPP1
118	CBT00511	Tenerife (Canary Islands)	3	259	Admixed
119	CBT02111	Tenerife (Canary Islands)	3	259	Admixed
120	V-5	Tenerife (Canary Islands)	3	259	Admixed
121	CBT02057	Tenerife (Canary Islands)	2	277	RPP2
122	CBT02110	Tenerife (Canary Islands)	2	278	Admixed
123	CBT00369	Tenerife (Canary Islands)	2	280	RPP3
124	A199	Tenerife (Canary Islands)	3	281	Admixed
125	CBT00514	Tenerife (Canary Islands)	2	2001	RPP1
126	CBT00537	Tenerife (Canary Islands)	3	2002	RPP1
127	CBT02108	Tenerife (Canary Islands)	2	2003	RPP1
128	CBT01742	Tenerife (Canary Islands)	3	2004	RPP3
129	SN	Tenerife (Canary Islands)	3	2005	RPP3
130	CBT00086	Tenerife (Canary Islands)	3	2006	RPP1
131	CBT02760	Tenerife (Canary Islands)	2	2007	RPP1
132	CBT02765	Tenerife (Canary Islands)	3	2008	RPP1
133	CBT01566	Tenerife (Canary Islands)	3	2009	RPP3
134	CBT02773	Tenerife (Canary Islands)	3	2010	RPP1
135	DHH0059	Tenerife (Canary Islands)	2	2011	RPP1
136	CBT02441	Tenerife (Canary Islands)	3	2013	RPP1
137	CBT01337	Tenerife (Canary Islands)	3	2014	RPP1
138	CBT01747	Tenerife (Canary Islands)	3	2015	RPP1
139	CBT01065	Tenerife (Canary Islands)	3	2016	RPP2
140	CBT00070	Tenerife (Canary Islands)	2	2017	Admixed
141	MEVB0055	Tenerife (Canary Islands)	2	2017	Admixed
142	V-8	Tenerife (Canary Islands)	3	2018	RPP1
143	MEVB0049	Tenerife (Canary Islands)	2	2019	RPP1
144	CBT00494	Tenerife (Canary Islands)	3	2020	RPP2
145	CBT01559	Tenerife (Canary Islands)	2	2021	RPP1
146	MEVB0033	Tenerife (Canary Islands)	2	2022	RPP1
147	CBT02409	Tenerife (Canary Islands)	2	2023	RPP3
148	MEVB0044	Tenerife (Canary Islands)	3	2024	RPP1
149	MEVB0032	Tenerife (Canary Islands)	3	2025	RPP1
150	V-19	Tenerife (Canary Islands)	3	2026	RPP1
151	CBT01571	Tenerife (Canary Islands)	2	A	RPP2
152	CBT02060	Tenerife (Canary Islands)	2	A	RPP2
153	CBT00576	Tenerife (Canary Islands)	3	B	RPP3
154	V-13	Tenerife (Canary Islands)	3	B	RPP3
155	CBT00424	Tenerife (Canary Islands)	3	D	Admixed
156	CBT01813	Tenerife (Canary Islands)	3	D	Admixed
157	CBT02771	Tenerife (Canary Islands)	3	D	Admixed
158	CBT02775	Tenerife (Canary Islands)	3	D	Admixed
159	CBT03063	Tenerife (Canary Islands)	3	D	Admixed
160	V-18	Tenerife (Canary Islands)	3	D	Admixed
161	CBT01741	Tenerife (Canary Islands)	3	G	RPP1
162	CBT03062	Tenerife (Canary Islands)	3	G	RPP1
163	CBT03064	Tenerife (Canary Islands)	3	G	RPP1
164	CBT03067	Tenerife (Canary Islands)	3	G	RPP1
165	CBT00505	Tenerife (Canary Islands)	3	H	RPP1
166	CBT01849	Tenerife (Canary Islands)	3	H	RPP1
167	CBT00515	Tenerife (Canary Islands)	2	L	RPP1
168	CBT00539	Tenerife (Canary Islands)	2	L	RPP1
169	CBT01472	Tenerife (Canary Islands)	2	L	RPP1
170	LP45	La Palma (Canary Islands)	2	38	RPP1
171	LP46	La Palma (Canary Islands)	2	38	RPP1
172	LP47	La Palma (Canary Islands)	2	38	RPP1
173	LP48	La Palma (Canary Islands)	2	38	RPP1
174	LP49	La Palma (Canary Islands)	2	38	RPP1
175	LP50	La Palma (Canary Islands)	2	38	RPP1
176	LP51	La Palma (Canary Islands)	2	38	RPP1
177	LP1	La Palma (Canary Islands)	2	38	RPP1
178	LP52	La Palma (Canary Islands)	2	38	RPP1
179	LP53	La Palma (Canary Islands)	3	39	RPP3
180	LP54	La Palma (Canary Islands)	2	40	RPP1
181	LP2	La Palma (Canary Islands)	2	40	RPP1
182	LP55	La Palma (Canary Islands)	2	40	RPP1
183	LP29	La Palma (Canary Islands)	2	42	Admixed
184	LP30	La Palma (Canary Islands)	2	42	Admixed
185	LP31	La Palma (Canary Islands)	2	42	Admixed
186	LP56	La Palma (Canary Islands)	2	43	Admixed
187	LP3	La Palma (Canary Islands)	2	43	Admixed
188	LP32	La Palma (Canary Islands)	2	44	RPP1
189	LP33	La Palma (Canary Islands)	2	44	RPP1
190	LP34	La Palma (Canary Islands)	2	45	RPP1
191	LP35	La Palma (Canary Islands)	2	45	RPP1
192	LP36	La Palma (Canary Islands)	2	45	RPP1
193	LP57	La Palma (Canary Islands)	2	46	RPP2
194	LP58	La Palma (Canary Islands)	2	46	RPP2
195	LP4	La Palma (Canary Islands)	2	46	RPP2
196	LP59	La Palma (Canary Islands)	2	46	RPP2
197	LP37	La Palma (Canary Islands)	3	48	RPP1
198	LP38	La Palma (Canary Islands)	3	48	RPP1
199	LP5	La Palma (Canary Islands)	2	49	RPP1
200	LP60	La Palma (Canary Islands)	2	49	RPP1
201	LP39	La Palma (Canary Islands)	3	50	RPP1
202	LP40	La Palma (Canary Islands)	2	63	RPP3
203	LP41	La Palma (Canary Islands)	3	64	RPP1
204	LP6	La Palma (Canary Islands)	2	68	RPP3
205	LP61	La Palma (Canary Islands)	2	68	RPP3
206	LP62	La Palma (Canary Islands)	2	68	RPP3
207	LP42	La Palma (Canary Islands)	3	69	RPP3
208	LP63	La Palma (Canary Islands)	3	71	RPP1
209	LP43	La Palma (Canary Islands)	3	71	RPP1
210	LP7	La Palma (Canary Islands)	2	106	RPP1
211	LP8	La Palma (Canary Islands)	2	117	RPP1
212	LP9	La Palma (Canary Islands)	3	141	RPP3
213	LP64	La Palma (Canary Islands)	2	163	RPP3
214	LP10	La Palma (Canary Islands)	2	169	RPP1
215	LP11	La Palma (Canary Islands)	2	171	RPP1
216	LP12	La Palma (Canary Islands)	2	174	RPP1
217	LP13	La Palma (Canary Islands)	2	177	RPP1
218	LP14	La Palma (Canary Islands)	2	198	RPP1
219	LP15	La Palma (Canary Islands)	3	210	RPP1
220	LP16	La Palma (Canary Islands)	3	211	RPP1
221	LP17	La Palma (Canary Islands)	2	216	RPP1
222	LP18	La Palma (Canary Islands)	2	217	RPP1
223	LP19	La Palma (Canary Islands)	3	218	RPP1
224	LP20	La Palma (Canary Islands)	2	221	RPP1
225	LP21	La Palma (Canary Islands)	3	227	RPP1
226	LP22	La Palma (Canary Islands)	3	228	RPP1
227	LP44	La Palma (Canary Islands)	2	229	RPP1
228	LP23	La Palma (Canary Islands)	2	238	RPP1
229	LP24	La Palma (Canary Islands)	2	242	RPP1
230	LP25	La Palma (Canary Islands)	3	243	RPP1
231	LP26	La Palma (Canary Islands)	3	253	RPP1
232	LP27	La Palma (Canary Islands)	3	267	RPP1
233	LP28	La Palma (Canary Islands)	2	274	RPP1
234	GC1026	Gran Canaria (Canary Islands)	3	16	RPP3
235	GC1009	Gran Canaria (Canary Islands)	2	34	RPP3
236	GC26	Gran Canaria (Canary Islands)	2	34	RPP3
237	GC94	Gran Canaria (Canary Islands)	2	34	RPP3
238	GC96	Gran Canaria (Canary Islands)	2	34	RPP3
239	GC1034	Gran Canaria (Canary Islands)	2	35	RPP3
240	GC1063	Gran Canaria (Canary Islands)	2	35	RPP3
241	GC1064	Gran Canaria (Canary Islands)	2	35	RPP3
242	GC1065	Gran Canaria (Canary Islands)	2	35	RPP3
243	GC1070	Gran Canaria (Canary Islands)	2	35	RPP3
244	GC1075	Gran Canaria (Canary Islands)	2	35	RPP3
245	GC1076	Gran Canaria (Canary Islands)	2	35	RPP3
246	GC1077	Gran Canaria (Canary Islands)	2	35	RPP3
247	GC1079	Gran Canaria (Canary Islands)	2	35	RPP3
248	GC1003	Gran Canaria (Canary Islands)	2	57	RPP3
249	GC1060	Gran Canaria (Canary Islands)	2	57	RPP3
250	GC1061	Gran Canaria (Canary Islands)	2	57	RPP3
251	GC1069	Gran Canaria (Canary Islands)	2	63	RPP3
252	GC18C	Gran Canaria (Canary Islands)	2	63	RPP3
253	GC1066	Gran Canaria (Canary Islands)	2	74	RPP1
254	GC1067	Gran Canaria (Canary Islands)	2	74	RPP1
255	GC1068	Gran Canaria (Canary Islands)	2	74	RPP1
256	GC1019	Gran Canaria (Canary Islands)	3	83	Admixed
257	GC18A	Gran Canaria (Canary Islands)	2	131	RPP3
258	GC83	Gran Canaria (Canary Islands)	3	158	Admixed
259	GC1031	Gran Canaria (Canary Islands)	2	161	RPP2
260	GC1071	Gran Canaria (Canary Islands)	2	168	RPP2
261	GC1073	Gran Canaria (Canary Islands)	2	194	RPP3
262	GC2	Gran Canaria (Canary Islands)	2	197	RPP3
263	GC1078	Gran Canaria (Canary Islands)	2	215	RPP2
264	GC17	Gran Canaria (Canary Islands)	2	263	RPP2
265	GC1037	Gran Canaria (Canary Islands)	3	264	RPP2
266	GC81	Gran Canaria (Canary Islands)	2	272	RPP2
267	Sevillana	Galicia	2	1	RPP2
268	Lourenzá	Galicia	2	2	RPP2
269	De Agosto-Septiembre	Galicia	3	3	Admixed
270	San Luis	Galicia	3	4	Admixed
271	CIAMCO107	Galicia	3	6	RPP3
272	Compota 1	Galicia	2	7	RPP3
273	CIAM CO99	Galicia	2	9	RPP3
274	Manteca Oro 1	Galicia	3	12	RPP3
275	Donguindo	Galicia	2	13	Admixed
276	Verdeñas	Galicia	3	14	RPP2
277	CIAM CO30	Galicia	2	15	Admixed
278	De San Juan 1	Galicia	2	17	Admixed
279	Rabuda 1	Galicia	3	18	RPP2
280	Conseridonia	Galicia	2	19	RPP2
281	Rabo Largo	Galicia	3	20	Admixed
282	Barburiñas	Galicia	2	21	RPP2
283	CIAM CO89	Galicia	2	22	Admixed
284	Manteca Septiembre	Galicia	2	26	RPP3
285	CIAM OU226	Galicia	3	27	RPP2
286	Urraca2	Galicia	3	28	RPP2
287	Libra	Galicia	3	29	Admixed
288	CIAM C011	Galicia	3	30	RPP3
289	Espín	Galicia	2	31	RPP2
290	De Agosto 1	Galicia	2	32	Admixed
291	Canela Octubre	Galicia	2	36	RPP3
292	CIAM LU209	Galicia	2	37	RPP3
293	De Agosto 2	Galicia	2	41	RPP3
294	De Agosto 3	Galicia	3	47	RPP3
295	CIAM OU223	Galicia	2	51	RPP3
296	CIAM CO39	Galicia	3	52	RPP3
297	San Germán	Galicia	3	66	RPP3
298	Rabuda 3	Galicia	2	73	RPP3
299	Compota 2	Galicia	2	78	Admixed
300	Tenreiras	Galicia	2	81	Admixed
301	Tardía 2	Galicia	3	87	RPP2
302	Peros S.Martiño	Galicia	2	90	RPP2
303	Tardía 1	Galicia	3	91	RPP2
304	De Invierno 3	Galicia	3	92	RPP2
305	Da Sementeira	Galicia	3	93	RPP3
306	Doña Juana	Galicia	2	94	RPP2
307	De Invierno 1	Galicia	2	95	RPP2
308	Donguindo 3	Galicia	3	97	RPP3
309	De San Juan 4	Galicia	2	98	Admixed
310	CIAM OU228	Galicia	3	99	RPP3
311	De San Antonio	Galicia	2	102	Admixed
312	CIAM LU179	Galicia	3	103	RPP3
313	CIAM OU233	Galicia	3	105	RPP3
314	Plateiras	Galicia	3	107	RPP2
315	Verdiñas Septiembre	Galicia	2	108	RPP2
316	Compota 3	Galicia	2	110	Admixed
317	CIAM CO94	Galicia	2	113	RPP3
318	Manteca Oro 2	Galicia	2	114	RPP3
319	De Santiago 1	Galicia	2	116	RPP2
320	CIAM CO51	Galicia	2	118	Admixed
321	Peros Miudos	Galicia	2	119	RPP2
322	Blanca Julio	Galicia	2	120	RPP3
323	CIAM LU207	Galicia	2	121	RPP3
324	De Agosto 4	Galicia	2	123	RPP3
325	Rabuda 2	Galicia	2	124	RPP3
326	Manteca Blanca	Galicia	2	127	RPP3
327	CIAM OU229	Galicia	2	128	Admixed
328	Peros Raposos	Galicia	2	129	Admixed
329	CIAM OU238	Galicia	3	130	Admixed
330	Mendoza	Galicia	2	132	RPP2
331	Barrosa	Galicia	2	133	RPP2
332	De Noviembre	Galicia	2	134	RPP2
333	Peras de Espiño	Galicia	2	135	RPP2
334	Rabuda Parda	Galicia	3	137	Admixed
335	Peros Amargos	Galicia	2	142	RPP2
336	CIAM CO70	Galicia	3	143	RPP3
337	CIAM PT157	Galicia	2	144	Admixed
338	San Breixo	Galicia	3	145	Admixed
339	CIAM PT158	Galicia	2	148	RPP3
340	Urraca Grande	Galicia	2	151	RPP3
341	Tardía 4	Galicia	2	152	RPP3
342	CIAM PT150	Galicia	2	153	RPP3
343	CIAM PT153	Galicia	2	154	Admixed
344	CIAM CO22	Galicia	3	157	RPP3
345	Urraca Blanca	Galicia	2	159	RPP2
346	De San Roque	Galicia	2	160	RPP2
347	De San Juan 3	Galicia	2	170	Admixed
348	CIAM PT129	Galicia	3	172	RPP3
349	Canela Pequeña	Galicia	3	178	RPP3
350	CIAM LU172	Galicia	2	185	Admixed
351	De San Juan 2	Galicia	3	186	RPP3
352	Bonita	Galicia	2	190	RPP2
353	De Invierno 2	Galicia	2	191	RPP3
354	Tardía 3	Galicia	2	192	Admixed
355	CIAM CO88	Galicia	2	195	RPP3
356	Tardía Muy Grande	Galicia	2	196	RPP3
357	De Codorno 2	Galicia	3	199	Admixed
358	Pero de Navidad	Galicia	2	203	RPP2
359	Manteca Canela Agosto	Galicia	2	207	RPP2
360	De Codorno 1	Galicia	2	214	RPP2
361	CIAM LU206	Galicia	2	222	Admixed
362	CIAM OU231	Galicia	3	224	Admixed
363	Temprana Agosto	Galicia	2	233	RPP2
364	Aguacenta	Galicia	2	235	RPP2
365	Tardía Invierno	Galicia	2	236	RPP2
366	Redonda Agosto	Galicia	3	237	RPP2
367	Fariñentas o de Cabana	Galicia	3	244	RPP2
368	Portuguesa	Galicia	2	246	RPP2
369	Pero	Galicia	3	247	RPP2
370	CIAM LU214	Galicia	3	249	Admixed
371	Espigarda	Galicia	3	250	RPP2
372	Donguindo 4	Galicia	2	252	RPP2
373	Pardas	Galicia	2	254	RPP2
374	CIAM CO87	Galicia	3	255	Admixed
375	CIAM LU189	Galicia	3	258	RPP2
376	Millarenga	Galicia	2	261	RPP2
377	Da Campaiña	Galicia	3	262	RPP2
378	Follá	Galicia	3	268	Admixed
379	Pero de Invierno	Galicia	2	270	RPP2
380	De Santiago 2	Galicia	2	271	RPP2
381	Urraca 3	Galicia	3	273	Admixed
382	Peros de Santos	Galicia	3	275	RPP2
383	CIAM CO18	Galicia	2	279	RPP2
384	AST1	Asturias	2	58	RPP2
385	AST2	Asturias	2	60	RPP3
386	AST3	Asturias	3	61	RPP3
387	AST4	Asturias	2	101	RPP3
388	AST5	Asturias	2	115	RPP3
389	AST6	Asturias	3	136	RPP2
390	AST7	Asturias	2	139	RPP3
391	AST8	Asturias	2	146	Admixed
392	AST9	Asturias	3	149	RPP3
393	AST10	Asturias	2	156	RPP2
394	AST11	Asturias	2	201	RPP2
395	AST12	Asturias	3	209	RPP2
396	AST13	Asturias	3	231	RPP3
397	AST14	Asturias	3	265	RPP2
398	AST15	Asturias	2	266	Admixed
399	AST16	Asturias	2	282	RPP2
400	Alba7	Silvestre	3	65	RPP2
401	Sil1	Silvestre	2	89	RPP2
402	Sil2	Silvestre	3	126	RPP2
403	Alba4	Silvestre	2	183	RPP2
404	Alba10	Silvestre	3	184	RPP2
405	Alba5	Silvestre	2	193	RPP2
406	Sil3	Silvestre	2	200	RPP2
407	Alba9	Silvestre	2	202	RPP2
408	Alba11	Silvestre	2	204	RPP2
409	Alba6	Silvestre	2	205	RPP2
410	Alba3	Silvestre	2	206	RPP2
411	Alba1	Silvestre	2	208	RPP2
412	Alba2	Silvestre	2	257	RPP2
413	Portuxesa	Commercial (Galician Nursery)	2	5	RPP3
414	Urraca	Commercial (Galician Nursery)	2	8	RPP2
415	Manteca verde	Commercial (Galician Nursery)	3	10	RPP3
416	Verdilarga	Commercial (Galician Nursery)	2	11	RPP2
417	Esganacan/Manteca Oscura	Commercial (Galician Nursery)	3	16	RPP3
418	Magallón	Commercial (Galician Nursery)	2	25	RPP2
419	Manteca de Oro Tardía 1	Commercial (Galician Nursery)	3	83	Admixed
420	Manteca de Oro Tardía 2	Commercial (Galician Nursery)	3	5002	Admixed
421	Manteca Temprana	Commercial (Galician Nursery)	2	85	RPP3
422	Urraca Amarela	Commercial (Galician Nursery)	3	88	RPP2
423	Caruxa	Commercial (Galician Nursery)	2	96	RPP2
424	Campana Xermade	Commercial (Galician Nursery)	3	104	RPP3
425	Do Santiago 2	Commercial (Galician Nursery)	2	138	RPP2
426	Bajin	Commercial (Galician Nursery)	2	147	RPP2
427	Rocha	Commercial (Galician Nursery)	2	175	Admixed
428	San Juan	Commercial (Galician Nursery)	2	189	Admixed
429	Negras de invierno	Commercial (Galician Nursery)	2	232	RPP2
430	San Xoan	Commercial (Galician Nursery)	2	234	RPP2
431	Do Santiago 1	Commercial (Galician Nursery)	2	251	RPP2
432	Vilasuso de Tarde	Commercial (Galician Nursery)	2	269	Admixed
433	Barburiña Xermade	Commercial (Galician Nursery)	3	276	RPP2
434	Espadón de Agua	Commercial (Galician Nursery)	2	5000	RPP3
435	Manteca Negra	Commercial (Galician Nursery)	3	80	Admixed
436	Tenreira	Commercial (Galician Nursery)	2	5003	Admixed
437	Castell	Commercial	3	33	RPP2
438	Williams	Commercial	2	34	RPP3
439	Blanquilla	Commercial	2	35	RPP3
440	Roma	Commercial	3	39	RPP3
441	Ercolini	Commercial	2	54	RPP3
442	Conference	Commercial	2	55	RPP3
443	Comice	Commercial	2	56	RPP3
444	Precoz de Moretini	Commercial	2	57	RPP3
445	Mantecosa Hardy	Commercial	2	59	RPP2
446	Limonera	Commercial	2	70	RPP3
447	Abbe Fetel	Commercial	2	82	RPP3
448	Passe Crassane	Commercial	2	84	RPP3
449	Max Red Bartlet	Commercial	2	86	RPP3
450	General Leclerc	Commercial	2	100	RPP3
451	Tosca Mediana	Commercial	2	163	RPP3
452	Pendula	Commercial	3	182	RPP2	Pyrus salicifolia
453	Sinseiiki	Commercial	2	220	RPP2	Pyrus pyrifolia
454	Nijiseiiki	Commercial	2	226	RPP2	Pyrus pyrifolia
455	Hosui	Commercial	3	241	RPP2	Pyrus pyrifolia
456	Chanticleer	Commercial	3	260	RPP2	Pyrus calleryana
